# Supplementary material
Source: publisher figshare collection journal article supplement (https://acs.figshare.com/ndownloader/files/4626415)
Supplement: Supplementary file 1 [file 4626415]

SUPPLEMENTAL INFORMATION FOR:

# Bridged Coordination Polymer Multilayers with Tunable Properties

*Clinton R. South<sup>#</sup> and Marcus Weck<sup>#,\*,†</sup>*

<sup>#</sup>School of Chemistry and Biochemistry, Georgia Institute of Technology, Atlanta, GA 30332-0400 and <sup>†</sup>Department of Chemistry and Molecular Design Institute, New York University, New York, NY 10003

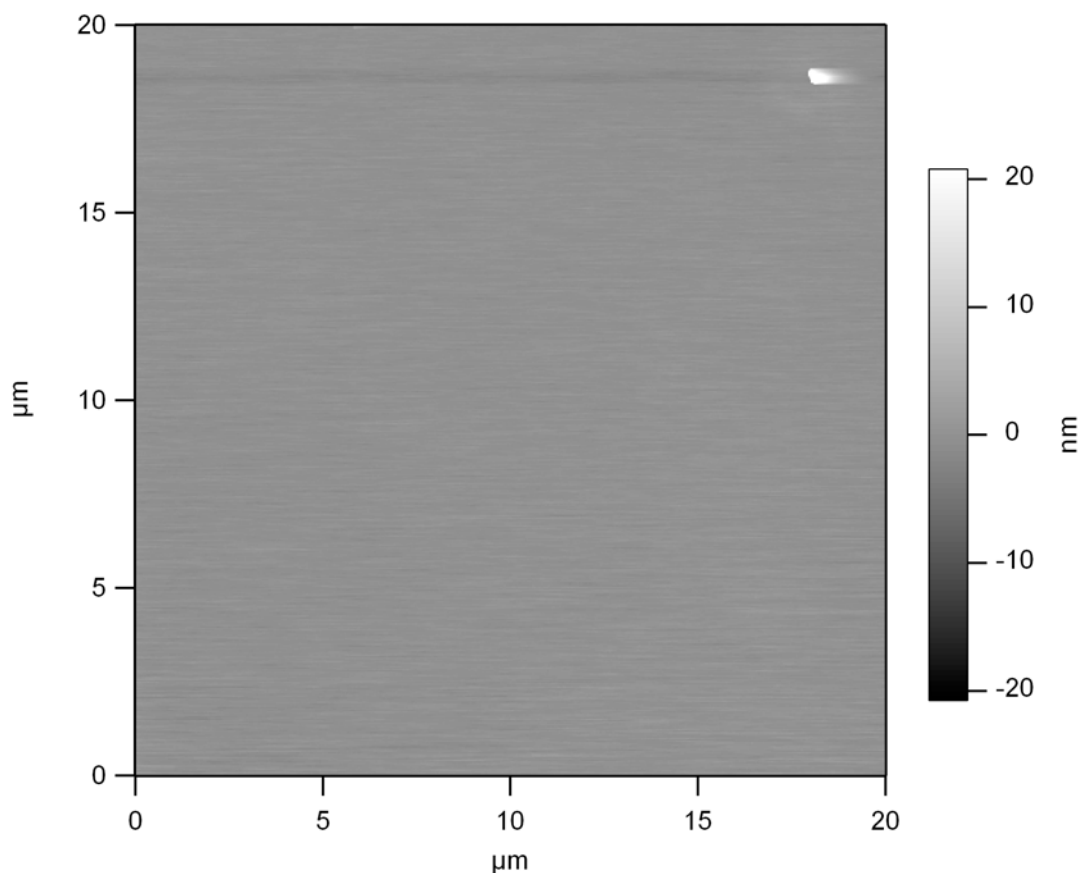

**Figure S1.** AFM image of cleaned quartz slide.

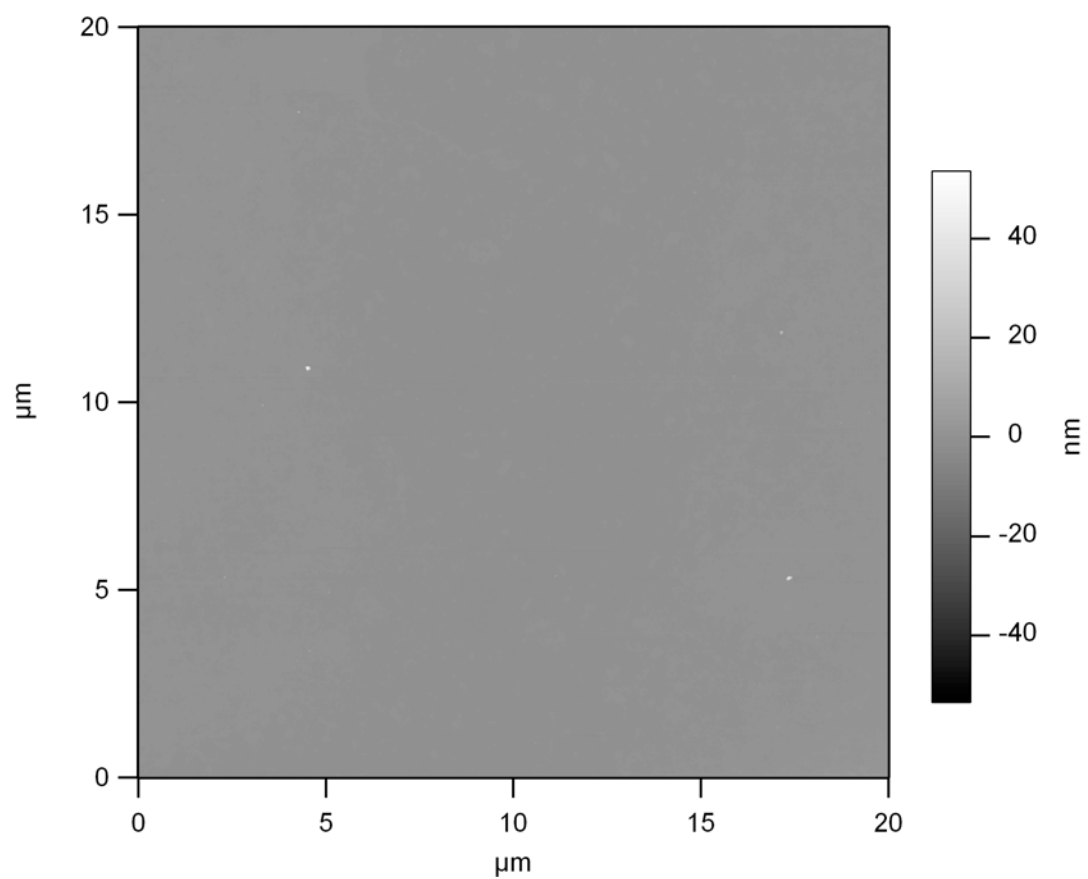

**Figure S2.** AFM image of quartz slide functionalized with **2**.

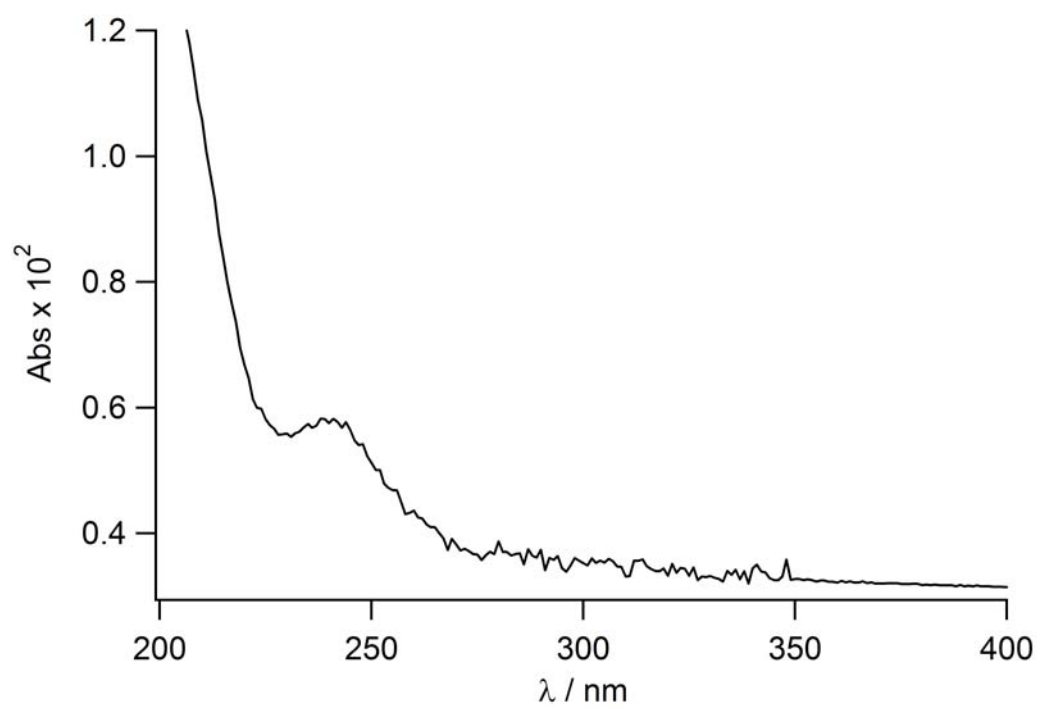

**Figure S3.** UV-vis spectra of a quartz slide functionalized with **2**.

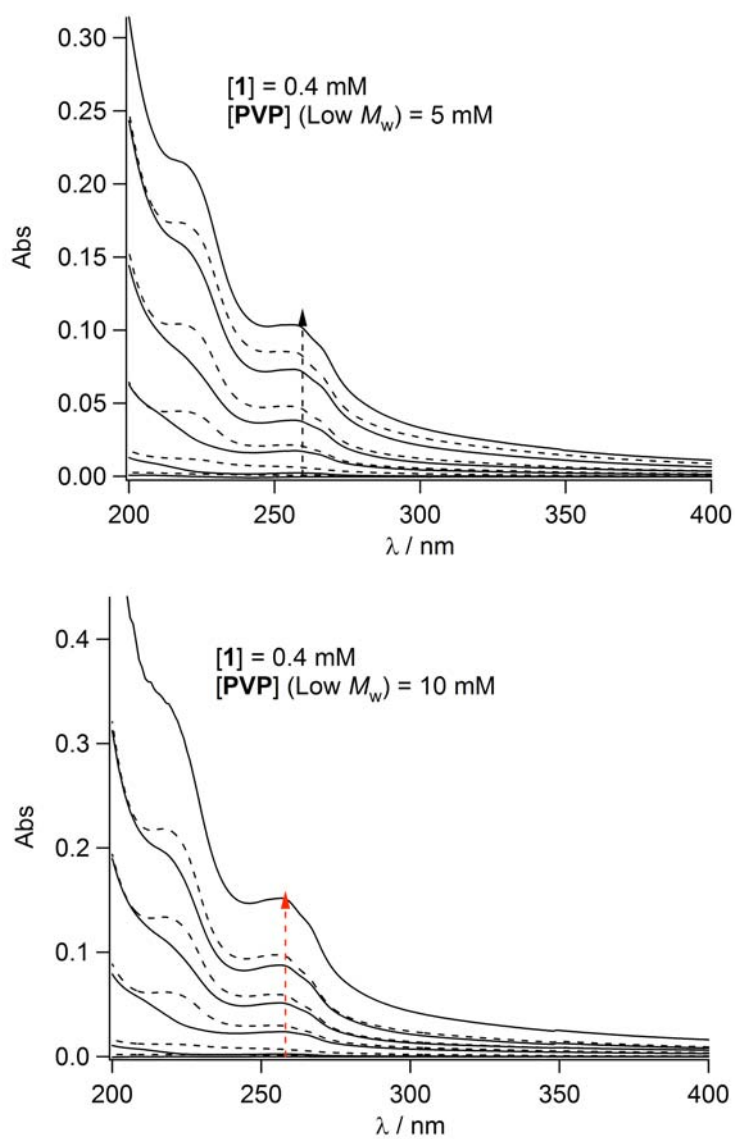

**Figure S3.** Remaining UV-vis profiles for the deposition of **PVPa** and **1**; deposition profile taken with [**PVPa**] = 1 mM is shown in Figure 1.

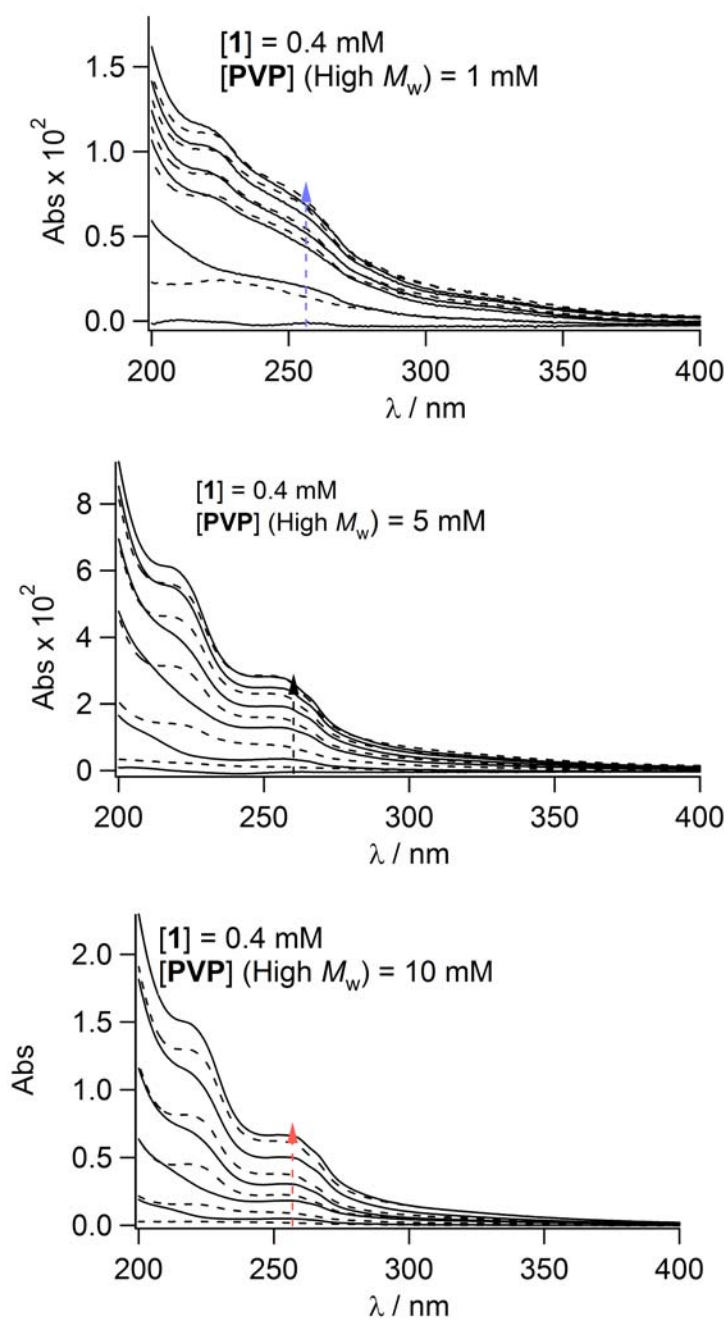

**Figure S4.** UV-vis absorption profiles for the deposition of **PVPb** with **1** at different concentrations of **PVPb**.

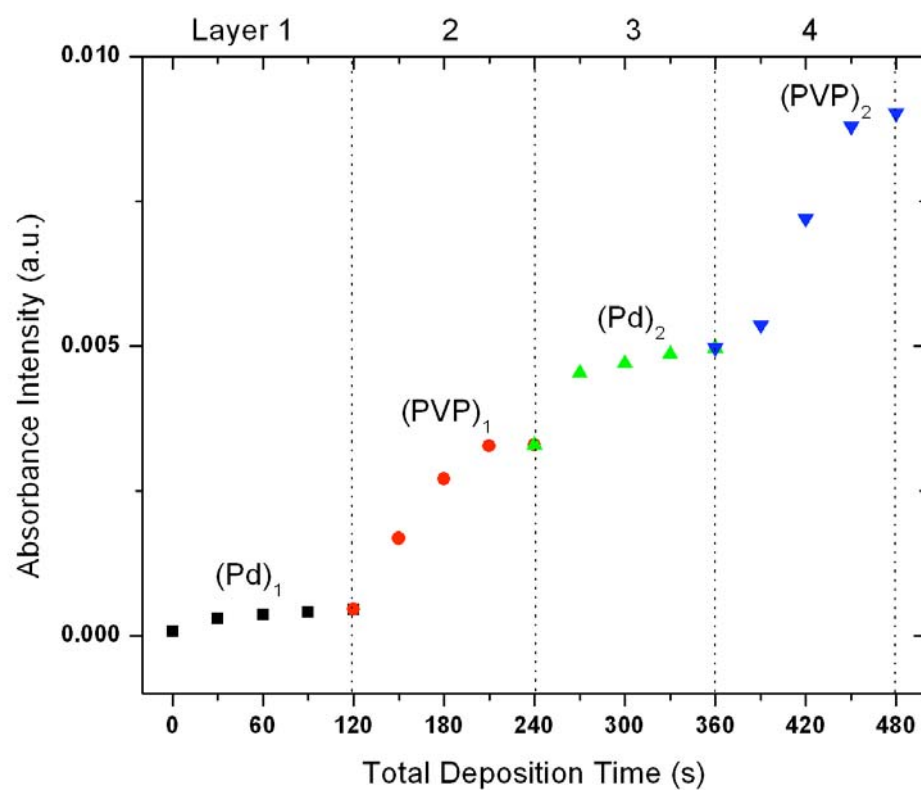

**Figure S5.** Kinetic profile taken during the deposition of **PVPa** with **1**.
